# Supplementary material for: A compact Incoherent Broadband Cavity Enhanced AbsorptionSpectrometer (IBBCEAS) for trace detection of nitrogen oxides,iodine oxide and glyoxal at sub-ppb levels for field application
Source: Copernicus journal article supplement (doi:10.5194/amt-2020-104), 2020-04-02
Supplement: Supplementary file [file amt-2020-104-AC1-supplement.pdf]

# **A compact Incoherent Broadband Cavity Enhanced Absorption Spectrometer (IBBCEAS) for trace detection of nitrogen oxides, iodine oxide and glyoxal at sub-ppb levels for field application**

## **Revision Notes**

Albane Barbero<sup>1</sup>, Camille Blouzon<sup>1</sup>, Joël Savarino<sup>1</sup>, Nicolas Caillon<sup>1</sup>, Aurélien Dommergue<sup>1</sup>, and Roberto Grilli<sup>1</sup>

<sup>1</sup>Univ. Grenoble Alpes, CNRS, IRD, Grenoble INP\*, IGE, 38000 Grenoble, France

\*Institute of Engineering Univ. Grenoble Alpes

Correspondence: Roberto Grilli (roberto.grilli@cnrs.fr)

Dear Editors,

We express our gratitude for the time and effort dedicated to the reviewing of our submitted manuscript. We worked diligently to address all the concerns raised by the referees and we thank the reviewers for the pertinent remarks that allowed to improve the manuscript. Below we provide our detailed response to their comments. We hope that the applied revisions are to the satisfaction of the editors.

Kind regards,

Albane Barbero, Camille Blouzon, Joël Savarino, Nicolas Caillon,  
Aurélien Dommergue, and Roberto Grilli

### Manuscript information

<https://doi.org/10.5194/amt-2020-104> Preprint.

**Title** “A compact Incoherent Broadband Cavity Enhanced Absorption Spectrometer (IBBCEAS) for trace detection of nitrogen oxides, iodine oxide and glyoxal at sub-ppb levels for field application”

**Authors** Albane Barbero, Camille Blouzon, Joël Savarino, Nicolas Caillon, Aurélien Dommergue, and Roberto Grilli

**Submitted to** Atmospheric Measurement techniques

## Reviewer 1:

### Comments I and II (Reviewer 1):

*Line 150: The authors present a calibration procedure using NO<sub>2</sub> as the calibration gas calibrated against a chemiluminescence (CLD) NO<sub>x</sub> detector as the standard. This seems counter intuitive to use an instrument that has a multitude of known flaws with regards to NO<sub>2</sub> detection and interference to standardize your instrument. If the authors had shown using a more consistent and reliable technique (such as the one employed by Washenfelder as referenced in the paper) and compared the mirror calibration to show that their NO<sub>2</sub> process is reliable, then this would have been an acceptable way to proceed.*

*Figure 3: The authors then show a time trace of good agreement of the IBBCEAS instrument with a CLD instrument. Of course, this isn't surprising, since the IBBCEAS was calibrated to the CLD instrument.*

Answer: The tight schedule between the development of the instruments and their first use in the field prevented a comparison experiment between the method described in the paper and the Rayleigh scattering method described by Washenfelder et al (2008) for determining the mirrors reflectivity. Fortunately, the instruments came back from the field early June and we were able to do the Rayleigh experiment using standard He gas (Messer, Helium 5.0, 99.999%) and standard N<sub>2</sub> gas (Air Liquide, Alpha Gaz 2, 99.9999 %) cylinders, 5 µm Whatman® filters and taking into account the CCD dark noise. In addition, in between the field expeditions and the return of the instruments, we received a calibrator (Gas Standard Generator FlexStream™, Kin-Tek Analytical, Inc.) able to produce a stable NO<sub>2</sub> source. The sample is produced using a permeation tube of NO<sub>2</sub> (Kin-Tek ELSRT2W) calibrated at an emission rate of 115 ng min<sup>-1</sup> at 40 °C loaded into the calibrator. This type of calibrator is ideally suited for creating trace concentration mixtures (from ppt to ppm). Despite those efforts, we were not satisfied by the results of this calibration method because of several arguments: one of them being the discrepancies between the Rayleigh cross sections provided by Min et al (2016) (empirical values) against the theoretical cross sections using equations provided by Thalman et al. (2014). The results of the experiment are shown in the Figure below : with Rayleigh curve we obtain 74.6 ppb of NO<sub>2</sub> using Min cross sections and 98.0 ppb of NO<sub>2</sub> using Thalman cross sections, while the Kin-Tek NO<sub>2</sub> source was set at 49.6 ppb. The retrieved curve for matching NO<sub>2</sub> absorption cross sections is the blue one at the top, which also better match in shape the expected theoretical curve provided by the manufacturer and which provide the best residue (1.0E<sup>-8</sup> cm<sup>-1</sup> against 1.3 E<sup>-8</sup> and 1.8E<sup>-8</sup> cm<sup>-1</sup> with Min and Thalman cross-sections, respectively). To confirm that the shape was correct, we further compared the convoluted literature absorption cross sections of CHOCHO with the experimental data (which applies our experimental reflectivity curve) and we obtain a good matching, confirming that the shape of the curve is correct (see Fig SI – 3).

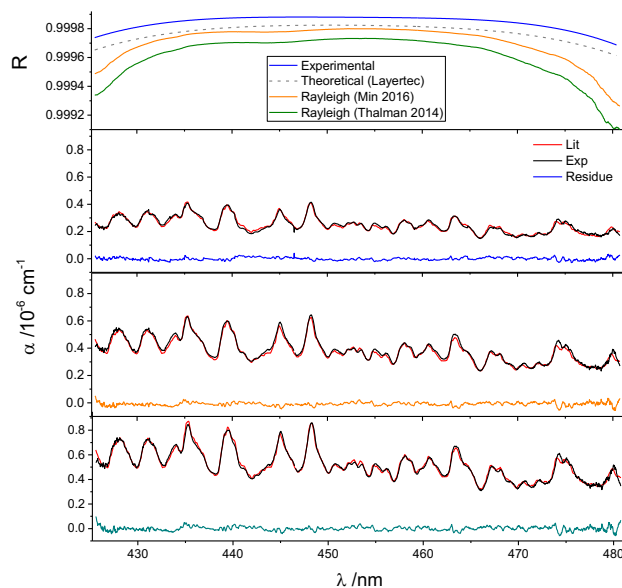

We were able to do a calibration using the approach described in the manuscript, against the FlexStream™ calibrator delivering NO<sub>2</sub> at  $49.6 \pm 0.2$  ppb, allowing us to identify any possible doubts regarding the NO<sub>2</sub> bottle used in the first instance. As shown in Figure 4(b) (reported here below), the instruments are well calibrated and have a linear response within a large range of concentrations.

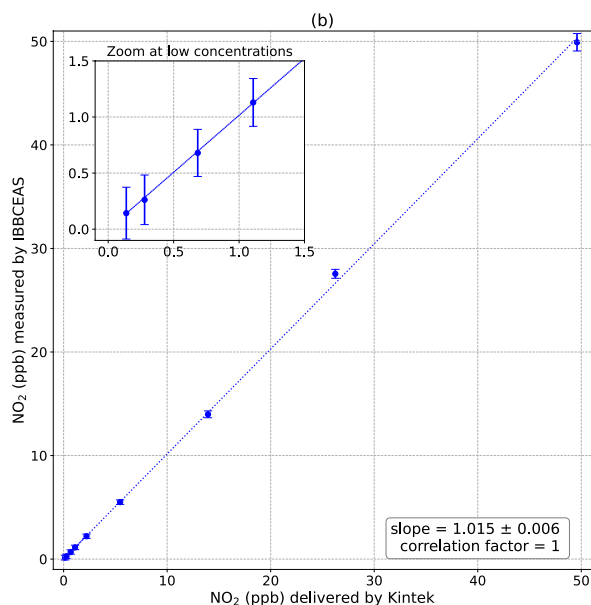

**Comment III (Reviewer 1):**

*Line 120: The argument that flow calculations show that the air doesn't impact the mirrors and therefore, no purge is necessary seems insufficient. Some air will impact on the mirrors, bringing humidity, organics and other material that will deposit out on the surface of the mirror and degrade the reflectivity over time. The authors present no further justification for whether this worked. What was the rate of decay in the mirror reflectivity over time? Did the lower reflectivity to start with impact the ability to get away with this set up?*

**Answer:** The Method part in the supplementary has been modified to better explain our approach:

## “1 Method

### 1.1 Solidworks simulation

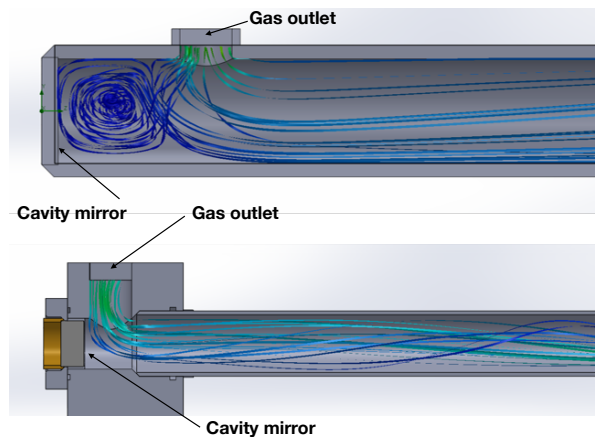

**Figure SI - 1.** SolidWorks simulations of the air flow entering the cavity at  $1 \text{ L min}^{-1}$ . (top) Turbulences created by the presence of a dead-volume between the cavity mirror and the gas exhaust. (bottom) Configuration with an optimum distance between the high reflective mirror and the gas outlet which maximize the effective optical pathlength, avoiding the use of purging gas at the mirrors while preserving the mirror cleanliness during the measurement. The gas inlet is placed at the center of the cavity.

Solid works simulations were made with two different mirrors positions without purge flow (Fig SI - 1). With the cavity mirrors placed one or two centimeters away from the exit of the air flow, presence of turbulences in front of the mirrors can be observed, which may compromise the long term cleanliness of the high reflectivity mirrors, Fig SI – 1 (top). By placing the mirrors close to the gas flow exit, the absence of dead-volume minimizes the residence time of particles by avoiding localized turbulences to take place as shown in Fig SI – 1 (bottom) and prevents the mirrors surface from deposition of dust and organic matter. In addition, PTFE membrane filters (Whatman® PTFE membrane filters – TE 38, 5  $\mu\text{m}$ , 47 mm) placed at the entrance of each sampling lines, reference and sample, prevent particles to enter the gas lines.

### 1.2 Mirrors cleanliness monitoring

A photodiode was mounted on a cap placed in front of the LED assemble. This allow to continuously monitor the LED intensity as  $PD_{\text{meas}}$ . After a calibration with a standard gas, the value at the photodiode and the mean light intensity at the CCD, while flushing with zero air and averaged over all the pixels, are stored as  $PD_{\text{calibr}}$  and  $I_{0-\text{calibr}}$ , respectively. At any time, the expected intensity,  $I_{0-\text{expected}}$ , at the CCD can be calculated as follow:

$$I_{0-\text{expected}} = I_{0-\text{calibr}} \left( \frac{PD_{\text{meas}}}{PD_{\text{calibr}}} \right)$$

and compare to the intensity at the CCD during measurements,  $I_{0-\text{meas}}$ . The ratio  $I_{0-\text{meas}} / I_{0-\text{expected}}$  is therefore a direct indicator of the mirrors cleanliness as the variability of the LED intensity is accounted for in real time. Fig SI - 2 shows a timeseries of 10 days measurements during which no calibrations

were made. The variability of the LED intensity, Fig SI - 2(a), is less than 0.05 % over 10 continuous days, implying that the variability of the signal intensity, Fig SI - 2(b), only represents the mirror cleanliness over time. The variability of the latter, being less than 2 % ( $3 \sigma$ ), validates the stability of the mirror reflectivity over time with the described set-up of our instruments and without purge flow.

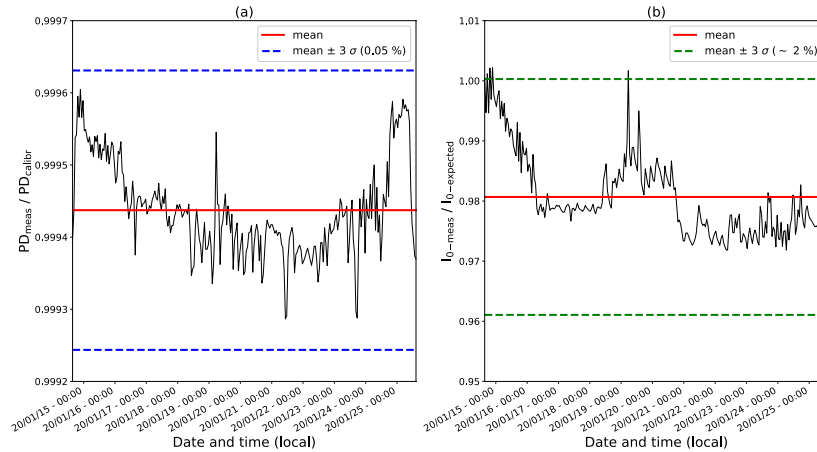

**Figure SI – 2:** Monitored signals over 10 continuous days of measurement without any adjustment or calibration of the instrument. (a)  $PD_{meas} / PD_{calibr}$  and (b)  $I_{0-meas} / I_{0-expected}$ .”

**Comment IV (Reviewer 1):**

*Line 212: Here it states that the instrument is sensitive to temperature and pressure drifts. While these all together can be tested through the variance analysis presented (in combination with any drift in the spectrometer noise), was there any effort to quantify how sensitive the instrument is to pressure changes?*

**Answer:** The instrument being designed to measure in a remote environment such as the Antarctic plateau where the average pressure is 650 mbar, it was decided from the start to regulate the pressure inside the cavity, justifying why no measurement to quantify how sensitive the instrument is to pressure changes was made. However, some precisions were added

- to the manuscript line 107: “a pressure sensor P (STS ATM.ECO – accuracy  $\pm 0.2 \%$ )”
- to the supplementary as long with the following Fig SI – 7: “While the pressure is monitored at  $\pm 0.2 \%$  accuracy, the cavity’s temperature is regulated to be 3 °C above ambient room temperature using a temperature controller and heat bands, as described in the manuscript. AW analysis were made with and without those heat bands to quantify how sensitive the instruments were to temperature changes. Fig SI – 7 shows the results obtained with the IBBCEAS-NO<sub>2</sub> instrument. Fig SI – 7 (left) shows the results with the heating bands turned off and one can see a deviation from the white noise after 1,300 averages with a maximum at  $\sim 10,000$  averages or  $\sim 42$  minutes corresponding to the laboratory temperature regulation cycle. However, by regulating the instrument temperature with the heating bands, the instrument is stable for longer

time, and is no longer affected by the external temperature variabilities as shown in Fig SI – 7 (right) ; similar results were observed for the IBBCEAS-NO<sub>x</sub> instrument.”

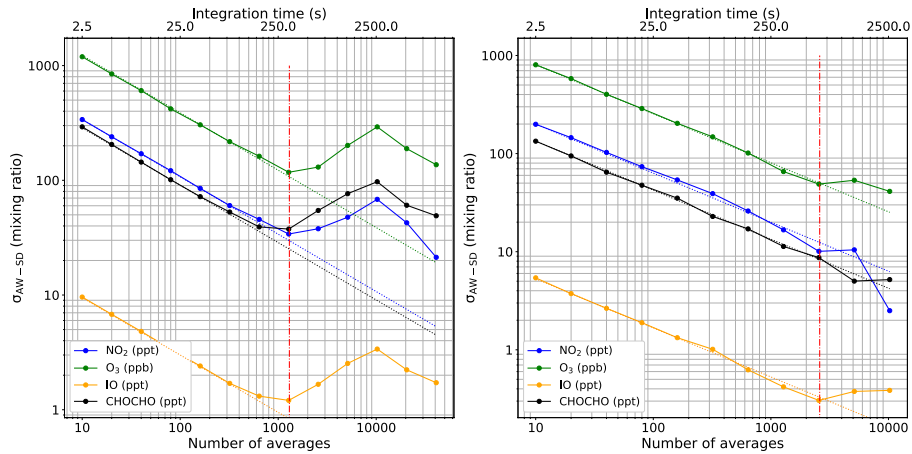

**Comment V (Reviewer 1):**

*Table 1: Comparisons are made to other IBBCEAS systems. While this is good, there is no effort to show them in a head to head comparison with comparable integration times which seems less useful, especially as the integration time listed for this instrument is 6 times longer than the next longest time in the table.*

**Answer:** The table was carefully checked and modified. A short text was added to comment on the differences observed between the recently developed instruments:

“Table 1 shows a comparison between the instrument presented in this work and other recently developed IBBCEAS systems. The detection limits are given in ppt min<sup>-1</sup> (1σ) with the normalization time that accounts for the acquisition of the reference (without absorption) and sample spectra to allow a better comparison. It should be noticed that all the other developments took advantage from an optical spectrometer with a cooled CCD device to reduce dark noise. A more compact and affordable spectrometer was preferred in this work. The cooling at the CCD would allow to gain up to a factor of ten on the signal to noise ratio, which would directly apply to the achievable detection limits. Furthermore, a CCD with a higher sensitivity would allow to select higher reflective mirror and increase the optical pathlength. Noteworthy, the optimum integration time, corresponding to a minimum of the σ<sub>AW-SD</sub>, is at 1,300 s (~ 22 min), allowing to achieve low detection limits even without a cooled CCD.”

**Table 1. Comparisons of the performances with other recently developed IBBCEAS systems**

| References           | Centered wavelength (nm) | Source FWHM (nm) | NO <sub>2</sub> detection limit (ppt min <sup>-1</sup> ) | Sample path length (cm) | Mirror reflectivity (%) | Optical length (km) | Mirrors purged | CCD cooled (°C) | Minimum σ <sub>AW-SD</sub> deviation (s) |
|----------------------|--------------------------|------------------|----------------------------------------------------------|-------------------------|-------------------------|---------------------|----------------|-----------------|------------------------------------------|
| Min et al. (2016)    | 455                      | 18               | 16                                                       | 48                      | 99.9973                 | 17.8                | no             | -70             | 100                                      |
| Jordan et al. (2019) | 505                      | 30               | 200                                                      | 102                     | 99.98                   | 5.1                 | yes            | -80             | 300                                      |
| Liu et al. (2019)    | 455                      | 18               | 33                                                       | 84                      | 99.993                  | 10.3                | yes            | -70             | 100                                      |
| Liang et al. (2019)  | 448                      | 15               | 15                                                       | 58.9                    | 99.9942                 | 11.7                | yes            | -10             | 3,500                                    |
| This work (2020)     | 450                      | 19               | 40                                                       | 41.7                    | 99.9905                 | 4.4                 | no             | no              | 1,300                                    |

Comment VI (Reviewer 1):

*Line 351: This appears to be in conflict with the Journal data policy. The data must be available in a repository or other source, not just on request.*

Answer: “The data used in this study are available from the corresponding author upon request” is commonly used by other papers published in AMT. The folder would be ready to be inserted in a repository if the journal requires to do so.

Additional comments (Reviewer 1):

1. *Title: Glyoxal is listed as a species of interest but never demonstrated. O<sub>3</sub> while demonstrated is only useful for the NO<sub>x</sub> (NO+NO<sub>2</sub>) version of the instrument in verifying how much O<sub>3</sub> is being used to titrate the NO. 40 ppb is not a useful LOD for ambient O<sub>3</sub> measurement.*

Answer: The reviewer is correct, the LOD for O<sub>3</sub> is indeed not enough for its monitoring at typical ambient concentrations. But this was not a goal of this development, and the O<sub>3</sub> monitoring turned out to be profitable for monitoring the NO to NO<sub>2</sub> conversion to assure the complete and only conversion of NO to get the NO<sub>x</sub> measurement. With the instruments being back from the field, we were able to demonstrate the measurements of Glyoxal (see Figure 2 modified in the manuscript).

2. *Line 56: Leading (to) different”: corrected*
3. *Section 4.2: It would be simple to use the IBBCEAS instrument as the primary standard for the NO<sub>2</sub> determination for the bottle if calibrated with N<sub>2</sub> and He as described previously in the literature. Given the issues with CLD instruments and how extremely far off the measured bottle concentration was from the standard.*

Answer: The comment is already addressed in the answer for major Comments I and II.

4. *Figure 6 caption: “Certain extend” change to extent : corrected.*
5. *Figure 7 caption: How important are the outliers? They seem to be very far out. Is there something that caused them that they could be filtered out and removed in the analysis. It would be reasonable to remove 10 points out of >5000 if there was some software or hardware issue (pressure spike) that caused them.*

Answer: We did not find a reason for disregarding those outliers. Without a validated justification that would explain how the outliers came to be, it is preferred to leave them since they don't impact the conclusion of the experiment. However, it should be noticed that even those outliers falls within the  $3\sigma$  uncertainty range, the Figure 7 has been adjusted to better highlight this observation.

6. *Table 1: The column labeled FWHM is not the instrument resolution, but the fit window, update to be consistent (if the FWHM was 30 nm, the instrument would not be measuring any of these species).*

Answer: We are sorry for the confusion, it was indeed the source width as the reviewer remarked. Regarding the table, as explained in the answer to Comment V, the table has been modified accordingly to the Reviewers comments.

7. *Line 274: Provide a reference for the Tenua software:* The following reference has been added: “Wachsstock, D.: Tenua: the kinetics simulator for Java; <http://bililite.com/tenua>., <http://bililite.com/tenua>, 2007.”
8. *Line 309: Replace “Last reaction” with “One more reaction”:* corrected.
9. *Line 312: Change to “In urban environments OH radicals can be observed up to  $4 \times 10^6 \text{ cm}^{-3}$ ”:* corrected.
10. *Line 322: Mention is made here with regard to water interference, and that it is fit, but no accuracy is stated for the retrieved water concentrations or their effect on the fits of other species and the RMS noise.*

Answer: Atmospheric measurements were done with and without fitting H<sub>2</sub>O to quantify the fitting interferences on NO<sub>2</sub>. The Figure below shows the FIT results without (left), and with (right) H<sub>2</sub>O being included in the FIT routine. For this particular measurements, the results were giving 262.4 and 301.8 ppt of NO<sub>2</sub> and 4.7 and 4.4 ppm of O<sub>3</sub>, respectively without and with the H<sub>2</sub>O, leading, for this measurement, to an underestimation of 13 % on the NO<sub>2</sub> mixing ratio with the presence of 0.44 % humidity added by the O<sub>3</sub> production system in the sample line.

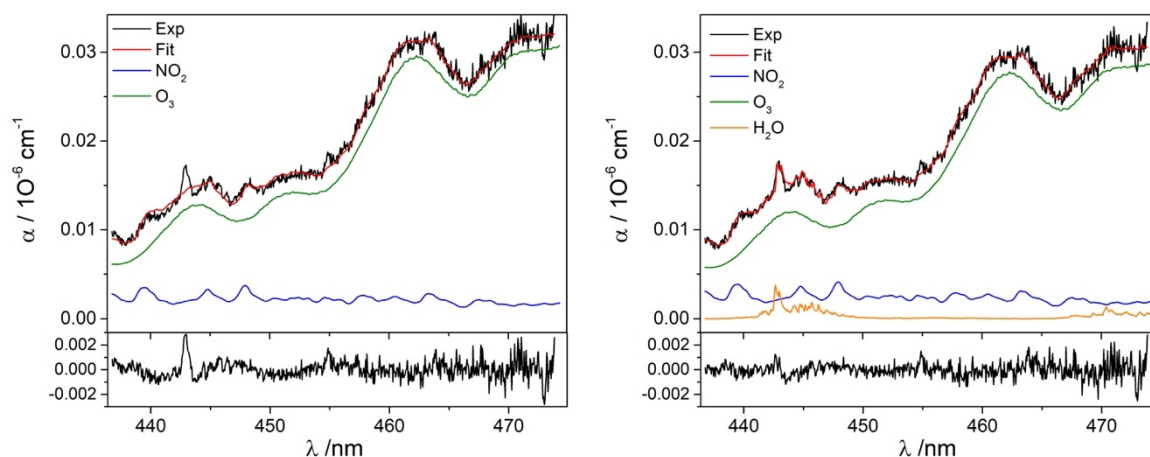

11. *Line 333: “absorption”, this should be extinction. IBCEAS instruments measure the sum of absorption + scattering (extinction).*

Answer: This remark is theoretically correct. The instrument does measure extinction because, even with a filter at the entrance of the spectrometer, we cannot completely remove particles. However, since the interest here lies on the molecular absorption measurement, we prefer to maintain this nomenclature “minimum detectably absorption coefficient” which will also be more consistent with the other literature works.



12. Line 334: “Thanks to the broadband feature”, the broadband feature or features of which species? Usually, these fits are sensitive to the narrow-band features which is what allows for simultaneous detection of multiple species: The sentence has been modified to a better understanding.
13. Line 341: “A better”, just start with Better: corrected.
14. Line 344: Revise to “The dynamic range, detection limits, and”: corrected.

Additional remark (from the authors):

All the English mistake or the typo corrections suggested by the Reviewers have been corrected. Other changes coming from the opportunities of new experiments from the comments of the Reviewers were made. All the changes can be found in red in the manuscript and supplementary. Also, the following references were added or corrected:

- Duan, J., Qin, M., Ouyang, B., Fang, W., Li, X., Lu, K., Tang, K., Liang, S., Meng, F., Hu, Z., Xie, P., Liu, W., and Häsler, R.: Development of an incoherent broadband cavity-enhanced absorption spectrometer for in situ measurements of HONO and NO<sub>2</sub> Atmos Meas Tech, 11, 4531-4543, 2018.
- Liu, J., Li, X., Yang, Y., Wang, H., Wu, Y., Lu, X., Chen, M., Hu, J., Fan, X., Zeng, L., and Zhang, Y.: An IBBCEAS system for atmospheric measurements of glyoxal and methylglyoxal in the presence of high NO<sub>2</sub> concentrations, Atmos Meas Tech, 12, 4439-4453, 2019.
- Venables, D. S., Gherman, T., Orphal, J., Wenger, J. C., and Ruth, A. A.: High Sensitivity in Situ Monitoring of NO<sub>3</sub> in an Atmospheric Simulation Chamber Using Incoherent Broadband Cavity-Enhanced Absorption Spectroscopy, Environ Sci Technol, 40, 6758-6763, 2006.
- Villena, G., Bejan, I., Kurtenbach, R., Wiesen, P., and Kleffmann, J.: Interferences of commercial NO<sub>2</sub> instruments in the urban atmosphere and in a smog chamber, Atmospheric Measurement Techniques, 5, 149–159, <https://doi.org/10.5194/amt-5-149-2012>, <https://www.atmos-meas-tech.net/5/149/2012/>, 2012.
- Volkamer, R., Spietz, P., Burrows, J., and Platt, U.: High-resolution absorption cross-section of glyoxal in the UV–vis and IR spectral ranges, Journal of Photochemistry and Photobiology A: Chemistry, 172, 35–46, <https://doi.org/10.1016/j.jphotochem.2004.11.011>, <https://linkinghub.elsevier.com/retrieve/pii/S1010603004005143>, 2005.
- Wachsstock, D.: Tenua: the kinetics simulator for Java; <http://bililite.com/tenua.>, <http://bililite.com/tenua>, 2007.
